# Supplementary material for: Navigating the current landscape of ocean observations: an overview from platform infrastructures to networks related to ocean time series
Source: Frontiers journal article supplement (doi:10.3389/fmars.2024.1363863), 2025-01-23
Supplement: Table_1.DOCX [file Table_1.DOCX]

Supplementary Material

Navigating the Current Landscape of Ocean Observations: An Overview From Infrastructure to Networks

Anabel von Jackowski

1CNRS/Sorbonne Université, UMR7621 Laboratoire d’Océanographie Microbienne, Banyuls-sur-Mer, France

*** Correspondence:**Anabel von Jackowski
anabel.vonjackowski@obs-banyuls.fr

# Supplementary Table

**Supplementary Table 1: Biogeochemical and ecological ship-based ocean time series stations.** Registered ship-based time series observatories are based on the International Group for Marine Ecological Time Series (IGMETS) marine ecological time series metadata (METabase), the International Ocean Carbon Coordination Project network, the EuroSea project database (Ratnarajah, 2021), and Buttigieg et al. (2018). If the ocean time series is missing from the list, the station is either missing within the respective database, not clearly labelled, or inactive.

| **Ocean Basin** | **Ship-based Time Series Station (n=432)** |
| --- | --- |
| Arctic Ocean | MarineBasis Zackenberg |
| Arctic Ocean | MarineBasis Nuuk FB 4 |
| Arctic Ocean | MarineBasis Nuuk FB 3.5 |
| Arctic Ocean | MarineBasis Nuuk FB 3 |
| Arctic Ocean | MarineBasis Nuuk FB 2.5 |
| Arctic Ocean | MarineBasis Nuuk FB 2 |
| Arctic Ocean | MarineBasis Nuuk FB 1.5 |
| Arctic Ocean | MarineBasis Nuuk FB 1 |
| Arctic Ocean | MarineBasis Nuuk GF 1 |
| Arctic Ocean | MarineBasis Nuuk GF 2 |
| Arctic Ocean | MarineBasis Nuuk Hovedstationen GF 3 |
| Arctic Ocean | MarineBasis Nuuk GF 4 |
| Arctic Ocean | MarineBasis Nuuk GF 5 |
| Arctic Ocean | MarineBasis Nuuk GF 6 |
| Arctic Ocean | MarineBasis Nuuk GF 7 |
| Arctic Ocean | MarineBasis Nuuk GF 8 |
| Arctic Ocean | MarineBasis Nuuk GF 9 |
| Arctic Ocean | MarineBasis Nuuk GF 10 |
| Arctic Ocean | MarineBasis Nuuk GF 11 |
| Arctic Ocean | MarineBasis Nuuk GF 12 |
| Arctic Ocean | MarineBasis Nuuk GF 13 |
| Arctic Ocean | MarineBasis Nuuk GF 14 |
| Arctic Ocean | MarineBasis Nuuk Kobbefjord |
| Arctic Ocean | MarineBasis Nuuk Nunngarussut |
| Arctic Ocean | MarineBasis Nuuk Qissuttuut |
| Arctic Ocean | MarineBasis Nuuk Qeqertannguit |
| Arctic Ocean | MarineBasis Nuuk |
| Arctic Ocean | Hausgarten - N5 |
| Arctic Ocean | Hausgarten - N4 |
| Arctic Ocean | Hausgarten - N3 |
| Arctic Ocean | Hausgarten - HG_I |
| Arctic Ocean | Hausgarten - HG_II |
| Arctic Ocean | Hausgarten - HG_III |
| Arctic Ocean | Hausgarten - HG_IV |
| Arctic Ocean | Hausgarten - HG_V |
| Arctic Ocean | Hausgarten - HG_VI |
| Arctic Ocean | Hausgarten - HG_VII |
| Arctic Ocean | Hausgarten - HG_VIII |
| Arctic Ocean | Hausgarten - HG_IX |
| Arctic Ocean | Hausgarten - SV_I |
| Arctic Ocean | Hausgarten - SV_II |
| Arctic Ocean | Hausgarten - SV_III |
| Arctic Ocean | Hausgarten - SV_IV |
| Arctic Ocean | Hausgarten - EG_I |
| Arctic Ocean | Hausgarten - EG_II |
| Arctic Ocean | Hausgarten - EG_III |
| Arctic Ocean | Hausgarten - EG_IV |
| Arctic Ocean | Hausgarten - S3 |
| Arctic Ocean | Fugløya-Bjørnøya Transect (7 stations) |
| Arctic Ocean | Vardø-Nord Transect (8 stations) |
| Arctic Ocean | Barrow Strait |
| Arctic Ocean | Pechora Sea 1 |
| Arctic Ocean | Pechora Sea 2 |
| Arctic Ocean | Pechora Sea 3 |
| Arctic Ocean | Pechora Sea 4 |
| Arctic Ocean | Pechora Sea 4 |
| Arctic Ocean | Pechora Bay 1 |
| Arctic Ocean | Pechora Bay 2 |
| Arctic Ocean | Gulf of Ob 1 |
| Arctic Ocean | Gulf of Ob 2 |
| Atlantic Ocean | Faroe Islands Shelf |
| Atlantic Ocean | Norwegian Sea Transect |
| Atlantic Ocean | DNAMAP-1510007 |
| Atlantic Ocean | DNAMAP-1 Ringkobing Fjord |
| Atlantic Ocean | DNAMAP- 22 Nissum Fjord |
| Atlantic Ocean | DNAMAP-3702-1 Nissum Bredning |
| Atlantic Ocean | DNAMAP-3 Lister Dyb |
| Atlantic Ocean | PHYTOBS At So |
| Atlantic Ocean | PHYTOBS Boulogne |
| Atlantic Ocean | PHYTOBS Cabourg |
| Atlantic Ocean | PHYTOBS Loguivy |
| Atlantic Ocean | PHYTOBS Luc sur Mer |
| Atlantic Ocean | PHYTOBS Roscoff Astan |
| Atlantic Ocean | PHYTOBS The Hebihens |
| Atlantic Ocean | PHYTOBS Wimereux Point C |
| Atlantic Ocean | PHYTOBS Arcachon Bouée 13 |
| Atlantic Ocean | PHYTOBS Auger |
| Atlantic Ocean | PHYTOBS Brest Sainte-Anne |
| Atlantic Ocean | PHYTOBS Concarneau Large |
| Atlantic Ocean | PHYTOBS Kervel |
| Atlantic Ocean | PHYTOBS Men er Roue |
| Atlantic Ocean | PHYTOBS La Rochelle - Antioche |
| Atlantic Ocean | PHYTOBS Le Cornard |
| Atlantic Ocean | PHYTOBS Men er Roué |
| Atlantic Ocean | PHYTOBS Teychan Bis |
| Atlantic Ocean | PHYTOBS Ouest Loscolo |
| Atlantic Ocean | PHYTOBS West Loscolo |
| Atlantic Ocean | SOMLIT Wimereux Point C |
| Atlantic Ocean | SOMLIT Wimereux Point L |
| Atlantic Ocean | SOMLIT Luc-sur-Mer Wharf |
| Atlantic Ocean | SOMLIT Luc-sur-Mer Smile |
| Atlantic Ocean | SOMLIT Dinard Bizeux |
| Atlantic Ocean | SOMLIT Dinard Le Buron |
| Atlantic Ocean | SOMLIT Dinard Cézembre |
| Atlantic Ocean | SOMLIT Roscoff Estacade |
| Atlantic Ocean | SOMLIT Roscoff Astan |
| Atlantic Ocean | SOMLIT Brest Portzic |
| Atlantic Ocean | SOMLIT La-Rochelle Antioche |
| Atlantic Ocean | SOMLIT Gironde pk 86 |
| Atlantic Ocean | SOMLIT Gironde pk 52 |
| Atlantic Ocean | SOMLIT Gironde pk 30 |
| Atlantic Ocean | SOMLIT Arcachon Comprian |
| Atlantic Ocean | SOMLIT Arcachon Eyrac |
| Atlantic Ocean | SOMLIT Arcachon Bouee 13 |
| Atlantic Ocean | Benthos Doggerbank Station 8 |
| Atlantic Ocean | Benthos Doggerbank Station 9 |
| Atlantic Ocean | Benthos Doggerbank Station 6 |
| Atlantic Ocean | Benthos Doggerbank Station 20 |
| Atlantic Ocean | Benthos Doggerbank Station 11 |
| Atlantic Ocean | Benthos Doggerbank Station 21 |
| Atlantic Ocean | Benthos Doggerbank Station 18 |
| Atlantic Ocean | Benthos Doggerbank Station 42 |
| Atlantic Ocean | Benthos Doggerbank Station 13 |
| Atlantic Ocean | Benthos Doggerbank Station 23 |
| Atlantic Ocean | Benthos Doggerbank Station 16 |
| Atlantic Ocean | Benthos Doggerbank Station 40 |
| Atlantic Ocean | Benthos Doggerbank Station 43 |
| Atlantic Ocean | Benthos Doggerbank Station 60 |
| Atlantic Ocean | Benthos Doggerbank Station 25 |
| Atlantic Ocean | Benthos Doggerbank Station 38 |
| Atlantic Ocean | Benthos Doggerbank Station 58 |
| Atlantic Ocean | Benthos Doggerbank Station 45 |
| Atlantic Ocean | Benthos Doggerbank Station 36 |
| Atlantic Ocean | Benthos Doggerbank Station 27 |
| Atlantic Ocean | Benthos Doggerbank Station 56 |
| Atlantic Ocean | Benthos Doggerbank Station 47 |
| Atlantic Ocean | Benthos Doggerbank Station 34 |
| Atlantic Ocean | Benthos Doggerbank Station 49 |
| Atlantic Ocean | Benthos Doggerbank Station 29 |
| Atlantic Ocean | Benthos Doggerbank Station 54 |
| Atlantic Ocean | Benthos Doggerbank Station 32 |
| Atlantic Ocean | Benthos Doggerbank Station 51 |
| Atlantic Ocean | Sylt Roads |
| Atlantic Ocean | Helgoland Roads |
| Atlantic Ocean | Helgoland Transects - P8 VI |
| Atlantic Ocean | Helgoland Transects - P8 V |
| Atlantic Ocean | Helgoland Transects - Eider IV |
| Atlantic Ocean | Helgoland Transects - Eider V |
| Atlantic Ocean | Helgoland Transects - Eider VI |
| Atlantic Ocean | Helgoland Transects - Eider III |
| Atlantic Ocean | Helgoland Transects - Eider I |
| Atlantic Ocean | Helgoland Transects - P8 II |
| Atlantic Ocean | Helgoland Transects - Eider II |
| Atlantic Ocean | Helgoland Transects - P8 III |
| Atlantic Ocean | Helgoland Transects - Elbe I |
| Atlantic Ocean | Helgoland Transects - P8 IV |
| Atlantic Ocean | Helgoland Transects - P8 I |
| Atlantic Ocean | Helgoland Transects - Elbe II |
| Atlantic Ocean | Helgoland Transects - E III |
| Atlantic Ocean | Helgoland Transects - Elbe III |
| Atlantic Ocean | Helgoland Transects - Elbe IV |
| Atlantic Ocean | Helgoland Transects - Elbe V |
| Atlantic Ocean | Helgoland Transects - Elbe VI |
| Atlantic Ocean | BENOSIS MZB-FSD |
| Atlantic Ocean | BENOSIS MZB-SLT |
| Atlantic Ocean | BENOSIS MZB-SSD |
| Atlantic Ocean | BENOSIS MZB-WD |
| Atlantic Ocean | BEFmate now DynaCom |
| Atlantic Ocean | North Sea Benthos Observatory |
| Atlantic Ocean | Niedersachsenbruecke |
| Atlantic Ocean | Cape Verde Ocean Observatory (CVOO) |
| Atlantic Ocean | Selvogsbanki Siglunes Transect - Lower - South |
| Atlantic Ocean | Selvogsbanki Siglunes Transect - Upper - North |
| Atlantic Ocean | North West Coast Ireland |
| Atlantic Ocean | West Coast Ireland |
| Atlantic Ocean | East Coast Ireland |
| Atlantic Ocean | South Coast Ireland |
| Atlantic Ocean | Southwest Coast Ireland |
| Atlantic Ocean | Svinøy Transect (15 stations) |
| Atlantic Ocean | CoastNET Mondego1 |
| Atlantic Ocean | CoastNET Mondego2 |
| Atlantic Ocean | CoastNET Mondego3 |
| Atlantic Ocean | LTSER Ria de Aveiro |
| Atlantic Ocean | CoastNET Tejo1 |
| Atlantic Ocean | CoastNET Tejo2 |
| Atlantic Ocean | CoastNET Tejo3 |
| Atlantic Ocean | CoastNET Mira1 |
| Atlantic Ocean | CoastNET Mira2 |
| Atlantic Ocean | CoastNET Mira3 |
| Atlantic Ocean | Cascais Bay |
| Atlantic Ocean | Guadiana Estuary (lower) |
| Atlantic Ocean | CASCAIS-WATCH Guadiana Upper Estuary |
| Atlantic Ocean | CASCAIS-WATCH Guadiana Lower Estuary |
| Atlantic Ocean | RADIALES Santander |
| Atlantic Ocean | RADIALES A Coruna |
| Atlantic Ocean | RADIALES Gijon |
| Atlantic Ocean | RADIALES Vigo |
| Atlantic Ocean | RADIALES Cudillero |
| Atlantic Ocean | Bilbao Estuary 35 |
| Atlantic Ocean | URDAIBAI 35 |
| Atlantic Ocean | Nervion River Estuary E1 |
| Atlantic Ocean | Nervion River Estuary E2 |
| Atlantic Ocean | AZTI Station D2, Bay of Biscay |
| Atlantic Ocean | Lorn Pelagic Observatory |
| Atlantic Ocean | Dove Time Series |
| Atlantic Ocean | CPR-A01 |
| Atlantic Ocean | CPR-A06 |
| Atlantic Ocean | CPR-B04 |
| Atlantic Ocean | CPR-B05 |
| Atlantic Ocean | CPR-B06 |
| Atlantic Ocean | CPR-B07 |
| Atlantic Ocean | CPR-B08 |
| Atlantic Ocean | CPR-B01 |
| Atlantic Ocean | CPR-B02 |
| Atlantic Ocean | CPR-C04 |
| Atlantic Ocean | CPR-C05 |
| Atlantic Ocean | CPR-C06 |
| Atlantic Ocean | CPR-C07 |
| Atlantic Ocean | CPR-C08 |
| Atlantic Ocean | CPR-C01 |
| Atlantic Ocean | CPR-C02 |
| Atlantic Ocean | CPR-D01 |
| Atlantic Ocean | CPR-D09 |
| Atlantic Ocean | CPR-D02 |
| Atlantic Ocean | CPR-D05 |
| Atlantic Ocean | CPR-D06 |
| Atlantic Ocean | CPR-D07 |
| Atlantic Ocean | CPR-D08 |
| Atlantic Ocean | CPR-C03 |
| Atlantic Ocean | CPR-D03 |
| Atlantic Ocean | CPR-D04 |
| Atlantic Ocean | CPR-E08 |
| Atlantic Ocean | CPR-E05 |
| Atlantic Ocean | CPR-E06 |
| Atlantic Ocean | CPR-E07 |
| Atlantic Ocean | CPR-E04 |
| Atlantic Ocean | CPR-E09 |
| Atlantic Ocean | CPR-E10 |
| Atlantic Ocean | CPR-F05 |
| Atlantic Ocean | CPR-F06 |
| Atlantic Ocean | CPR-F07 |
| Atlantic Ocean | CPR-F04 |
| Atlantic Ocean | CPR-F08 |
| Atlantic Ocean | CPR-F09 |
| Atlantic Ocean | CPR-F10 |
| Atlantic Ocean | Scottisch Coastal Observatory Stonehaven |
| Atlantic Ocean | Scottisch Coastal Observatory Cromarty |
| Atlantic Ocean | Scottisch Coastal Observatory Scapa Bay |
| Atlantic Ocean | Scottisch Coastal Observatory Scalloway |
| Atlantic Ocean | Scottisch Coastal Observatory Loch Ewe |
| Atlantic Ocean | Scottisch Coastal Observatory Loch Maddy |
| Atlantic Ocean | Scottisch Coastal Observatory Mallaig |
| Atlantic Ocean | Scottisch Coastal Observatory Millport |
| Atlantic Ocean | Western Channel Observatory Plymouth E1 |
| Atlantic Ocean | Western Channel Observatory Plymouth L4 |
| Atlantic Ocean | Cypris |
| Atlantic Ocean | Colne estuary microbial LTER Station 1 East Mills River |
| Atlantic Ocean | Colne estuary microbial LTER Station 2 Hythe Bridge |
| Atlantic Ocean | Colne estuary microbial LTER Station 3 Rowhedge Ferry |
| Atlantic Ocean | Colne estuary microbial LTER Station 4 Alresford Cree |
| Atlantic Ocean | Colne estuary microbial LTER Station 5 Brightlingsea |
| Atlantic Ocean | Porcupine Abyssal plain (PAP) |
| Atlantic Ocean | Egi |
| Atlantic Ocean | EPEA Estacion Permanente de Estudios Ambientales |
| Atlantic Ocean | Bahía Blanca |
| Atlantic Ocean | Patos Lagoon Estuary |
| Atlantic Ocean | AZOMP AR7W Zone 5 Greenland Shelf |
| Atlantic Ocean | AZOMP AR7W Zone 4 Eastern Labrador Sea |
| Atlantic Ocean | AZOMP AR7W Zone 3 Central Labrador Sea |
| Atlantic Ocean | AZOMP AR7W Zone 2 Labrador Slope |
| Atlantic Ocean | AZOMP AR7W Zone 1 Labrador Shelf |
| Atlantic Ocean | AZOMP Eastern Scotian Shelf |
| Atlantic Ocean | AZOMP Central Scotian Shelf |
| Atlantic Ocean | AZOMP Western Scotian Shelf |
| Atlantic Ocean | AZOMP Anticosti |
| Atlantic Ocean | AZOMP Gaspe Current |
| Atlantic Ocean | AZOMP Shediac |
| Atlantic Ocean | AZOMP Rimouski |
| Atlantic Ocean | Labrador Sea (BIO) |
| Atlantic Ocean | Davis Strait |
| Atlantic Ocean | Halifax Line (Offshore) |
| Atlantic Ocean | Halifax Line 2 (Scotian Shelf) |
| Atlantic Ocean | Bedford Basin Monitoring Program Bedford Basin |
| Atlantic Ocean | Deadmans Harbour (Bay of Fundy) |
| Atlantic Ocean | Prince 5 (Bay of Fundy) |
| Atlantic Ocean | Wolves Islands (Bay of Fundy) |
| Atlantic Ocean | Passamaquoddy Bay (Bay of Fundy) |
| Atlantic Ocean | Lime Kiln Bay (Bay of Fundy) |
| Atlantic Ocean | Brandy Cove (Bay of Fundy) |
| Atlantic Ocean | Bay of Fundy |
| Atlantic Ocean | Cartagena |
| Atlantic Ocean | BATS |
| Atlantic Ocean | ECOMON (NMFS-Northeast US Shelf) |
| Atlantic Ocean | SOOP (NMFS -Northeast US Shelf) |
| Atlantic Ocean | Gulf of Maine North Atlantic Time Series Boothbay |
| Atlantic Ocean | NH01 |
| Atlantic Ocean | NH03 |
| Atlantic Ocean | NH05 |
| Atlantic Ocean | NH10 |
| Atlantic Ocean | NH15 |
| Atlantic Ocean | NH20 |
| Atlantic Ocean | NH25 |
| Atlantic Ocean | Narragansett Bay |
| Baltic Sea | DNAMAP- 170006 Århus Bugt |
| Baltic Sea | DNAMAP-1727 Køge Bugt |
| Baltic Sea | DNAMAP-190004 Hevring Bugt |
| Baltic Sea | DNAMAP-3708-1 Løgstør Bredning |
| Baltic Sea | DNAMAP-3727-1 Skive Fjord |
| Baltic Sea | DNAMAP-409 Ålborg Bugt |
| Baltic Sea | DNAMAP-413 Anholt East |
| Baltic Sea | DNAMAP-4273 Vejle Fjord |
| Baltic Sea | DNAMAP-431 Ven |
| Baltic Sea | DNAMAP-444 Arkona |
| Baltic Sea | DNAMAP-5503 Mariager Fjord |
| Baltic Sea | DNAMAP-5790 Horsens Fjord |
| Baltic Sea | DNAMAP-60 Roskilde Fjord |
| Baltic Sea | DNAMAP- 6300043 Lillebælt-South |
| Baltic Sea | DNAMAP- 6870 Lillebælt-North |
| Baltic Sea | DNAMAP- 6900017 Odense Fjord |
| Baltic Sea | DNAMAP-925 Gniben |
| Baltic Sea | DNAMAP-939 Storebælt |
| Baltic Sea | DNAMAP-bmpk2 Bornholm Deep |
| Baltic Sea | Tallinn Bay |
| Baltic Sea | Parnu Bay |
| Baltic Sea | Bothnian Bay Region F2 |
| Baltic Sea | Bothnian Sea Region F64 |
| Baltic Sea | Bothnian Sea Region SR5 |
| Baltic Sea | Bothnian Sea Region US5b |
| Baltic Sea | Bothnian Bay Region Bo3 |
| Baltic Sea | Gulf of Finland Region LL12 |
| Baltic Sea | Gulf of Finland Region LL7 |
| Baltic Sea | Gulf of Finland Region LL3A |
| Baltic Sea | Northern Baltic Proper Region LL17 |
| Baltic Sea | Northern Baltic Proper Region LL23 |
| Baltic Sea | Northern Baltic Proper Region BY15 |
| Baltic Sea | Northern Baltic Proper Region BY38 |
| Baltic Sea | Biologische Station Zingst |
| Baltic Sea | Pomeranian Bay |
| Baltic Sea | Eastern Gotland Basin |
| Baltic Sea | Bornholm Basin |
| Baltic Sea | Mecklenburg Bight |
| Baltic Sea | Boknis Eck Time-Series Station |
| Baltic Sea | Arkona Basin |
| Baltic Sea | Eastern Gotland Basin |
| Baltic Sea | Gulf of Riga Station 121 |
| Baltic Sea | Arendal Station 2 |
| Baltic Sea | Southern Gotland Basin |
| Baltic Sea | Bornholm Basin |
| Baltic Sea | Gdansk Basin |
| Baltic Sea | Linnaeus Microbial Observatory |
| Baltic Sea | SMHI Anholt East |
| Baltic Sea | SMHI Slaggo |
| Baltic Sea | SMHI A17 |
| Indian Ocean | IMOS Reference Stradbroke Island |
| Indian Ocean | IMOS Reference Darwin |
| Indian Ocean | IMOS Reference Rottnest Island |
| Indian Ocean | IMOS Reference Ningaloo |
| Indian Ocean | Coastal Bay of Bengal (Vizag) |
| Indian Ocean | Candolim Time-Series (CaTS) |
| Indian Ocean | Arabian Sea Time-Series (ASTS) |
| Indian Ocean | Bay of Bengal Time-Series (BBTS) |
| Mediterranean Sea | Sozopol |
| Mediterranean Sea | Kaliakra |
| Mediterranean Sea | Galata |
| Mediterranean Sea | Varna Bay |
| Mediterranean Sea | Stoncica (central Adriatic Sea) |
| Mediterranean Sea | Kastela Bay (central Adriatic Sea) |
| Mediterranean Sea | Bay of Calvi (Corsica) |
| Mediterranean Sea | PHYTOBS Bouzigues |
| Mediterranean Sea | PHYTOBS Villefranche Point B |
| Mediterranean Sea | PHYTOBS Marseille Solemio |
| Mediterranean Sea | PHYTOBS Parc Leucate 2 |
| Mediterranean Sea | PHYTOBS Sète |
| Mediterranean Sea | PHYTOBS Banyuls Sola |
| Mediterranean Sea | PHYTOBS Barcarès |
| Mediterranean Sea | PHYTOBS Leucate Park 2 |
| Mediterranean Sea | PHYTOBS Thau Lagoon |
| Mediterranean Sea | SOMLIT Banyuls Sola |
| Mediterranean Sea | SOMLIT Sète |
| Mediterranean Sea | SOMLIT Marseille Frioul |
| Mediterranean Sea | SOMLIT Villefranche Point B |
| Mediterranean Sea | MOOSE MOLA Gulf of Lyon (Banyuls) |
| Mediterranean Sea | MOOSE ANTARES (Marseille) |
| Mediterranean Sea | MOOSE DYFAMED (Villefranche) |
| Mediterranean Sea | Saronikos Gulf S11 (Aegean Sea) |
| Mediterranean Sea | Gulf of Naples LTER-MC |
| Mediterranean Sea | Gulf of Taranto |
| Mediterranean Sea | Gulf of Asinara |
| Mediterranean Sea | Laguna di Cabras |
| Mediterranean Sea | Laguna di Santa Giusta |
| Mediterranean Sea | Gulf of Trieste LTER C1 |
| Mediterranean Sea | Gulf of Venice |
| Mediterranean Sea | Gulf of Trieste LTER |
| Mediterranean Sea | Baleares Station |
| Mediterranean Sea | Málaga Bay |
| Mediterranean Sea | Blanes Bay |
| Mediterranean Sea | Medes Islands |
| Mediterranean Sea | Zmiinyi island |
| Mediterranean Sea | Morris Khan Research Station |
| Pacific Ocean | IMOS Reference Yongala |
| Pacific Ocean | IMOS Reference Port Hacking |
| Pacific Ocean | Line-P P26 Station PAPA |
| Pacific Ocean | Line-P P20 |
| Pacific Ocean | Line-P P16 |
| Pacific Ocean | Line-P P12 |
| Pacific Ocean | Line-P P08 |
| Pacific Ocean | Line-P P04 |
| Pacific Ocean | Line-P P02 |
| Pacific Ocean | COPAS Bay of Mejillones |
| Pacific Ocean | COPAS Concepcion Station 18 |
| Pacific Ocean | La Libertad |
| Pacific Ocean | Manta |
| Pacific Ocean | Japan Meteorological Agency (JMA) 137°E |
| Pacific Ocean | Japan Meteorological Agency (JMA) 165°E |
| Pacific Ocean | JAMSTEC KNOT |
| Pacific Ocean | JAMSTEC-K2 |
| Pacific Ocean | JAMSTEC-S1 |
| Pacific Ocean | Ensenada |
| Pacific Ocean | IMARPE A |
| Pacific Ocean | IMARPE B |
| Pacific Ocean | IMARPE C |
| Pacific Ocean | Nanwan Bay |
| Pacific Ocean | King Sejong Station (KOPRI) |
| Pacific Ocean | CALCOFI-080-055 |
| Pacific Ocean | CALCOFI-080-080 |
| Pacific Ocean | CALCOFI-090-090 |
| Pacific Ocean | CCE LTER 2 |
| Pacific Ocean | CCE LTER 1 |
| Pacific Ocean | MBARI |
| Pacific Ocean | San Pedro Ocean Time-series (SPOT) |
| Pacific Ocean | HOT |
| Pacific Ocean | Northern Gulf of Alaska LTER |
| Pacific Ocean | San Francisco Bay |
| Pacific Ocean | Santa Barbara Channel - 7 stations |
| Pacific Ocean | Munida |
| Southern Ocean | Rothera Oceanographic and Biological Time Series Site 1 |
| Southern Ocean | Rothera Oceanographic and Biological Time Series Site 2 |
| Southern Ocean | South Georgia time series |
| Southern Ocean | Southern Ocean Time-Series (SOTS) |
| Southern Ocean | IMOS Reference Esperance |
| Southern Ocean | IMOS Reference Kangaroo Island |
| Southern Ocean | Palmer LTER |
